# Supplementary material for: Visible light driven imine formation using a CuO–R G photocatalyst
Source: Royal Society of Chemistry journal article supplement (doi:10.1039/d5nj03300d), 2025-01-01
Supplement: d5nj03300d1.pdf [file d5nj03300d1.pdf]

## Visible light driven Imine formation using CuO-R<sub>G</sub> photocatalyst

Komal Trivedi<sup>a</sup>, Bhanupriya Yadav<sup>b</sup>, Rohit Shrivastav<sup>b</sup>, Chetan K. Modi<sup>a,\*</sup>

<sup>a</sup>*Department of Applied Chemistry, Faculty of Technology & Engineering, The Maharaja Sayajirao University of Baroda, Vadodara, Gujarat-390001, India*

<sup>b</sup>*Dayalbagh Educational Institute, Agra, UttarPradesh-282005, India*

---

### Supplementary Information

#### Synthesis of Graphene oxide (G)

G (graphene oxide) was synthesized using well known Hummers' method. 2 g graphite flakes and 2 g NaNO<sub>3</sub> were taken, followed by addition of 90 mL 98% H<sub>2</sub>SO<sub>4</sub> maintaining the temperature less than 15°C. KMnO<sub>4</sub> was introduced gradually keeping the temperature of reaction under 15°C. Subsequently, deionized water was added gradually to the resultant solution along with constant stirring at low temperature. The resultant solution was added to a round bottom flask. It was then refluxed at 98°C for 15 min, subsequently, the temperature was progressively decreased to 30°C and it was maintained with constant stirring. The temperature was reduced to 25°C, subsequently drop by drop addition of 30% H<sub>2</sub>O<sub>2</sub>. Then, the solution was transferred into beaker, containing 200 mL deionized water. Then, the beakers were kept undisturbed for 8-10 h allowing the particles to sediment to the bottom. Then, resultant solid precipitates were washed with 10% HCl by centrifugation followed by deionized water until the neutral pH is achieved. The final resulting product obtained was dried at 80°C in an oven, subsequently, crushed and grinded in mortar and pestle to obtain powder form.
